# Supplementary material for: Mapping and Candidate Gene Analysis of an All-Stage Stem Rust Resistance Gene in Durum Wheat Landrace PI 94701
Source: MDPI journal article supplement (doi:10.3390/plants13162197), 2024-08-08
Supplement: s1 [file plants-3112984-supplementary.pdf › plants-3112984-supplementary.pdf]

## Supplementary Figures

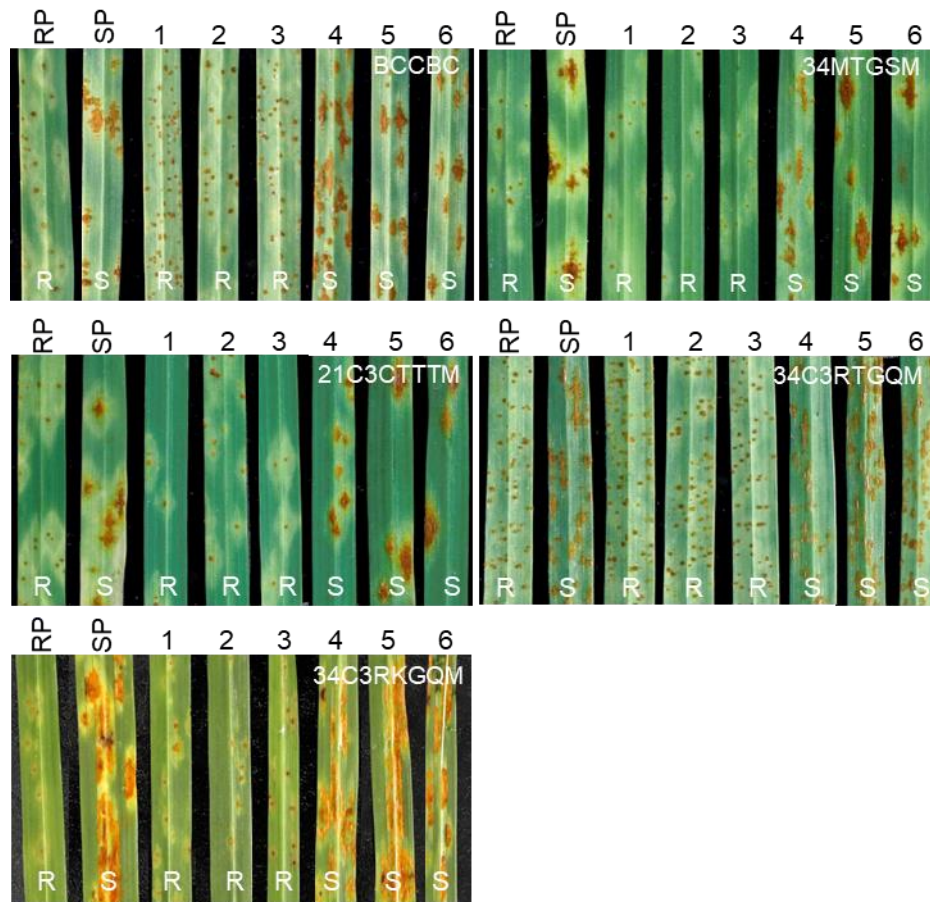

**Figure S1** Infection types to *Pgt* races BCCBC, 34MTGSM, 21C3CTTTM, 34C3RTGQM, and 34C3RKGQM in F<sub>2:3</sub> families selected from the PI 94701 × Rusty cross. Plants were grown in five independent growth chambers at 22-24 °C with 16 h light/8 h dark. RP, resistant parent; SP, susceptible parent; 1-3, resistant F<sub>3</sub> plants; 4-6, susceptible F<sub>3</sub> plants; R, resistant; S, susceptible.

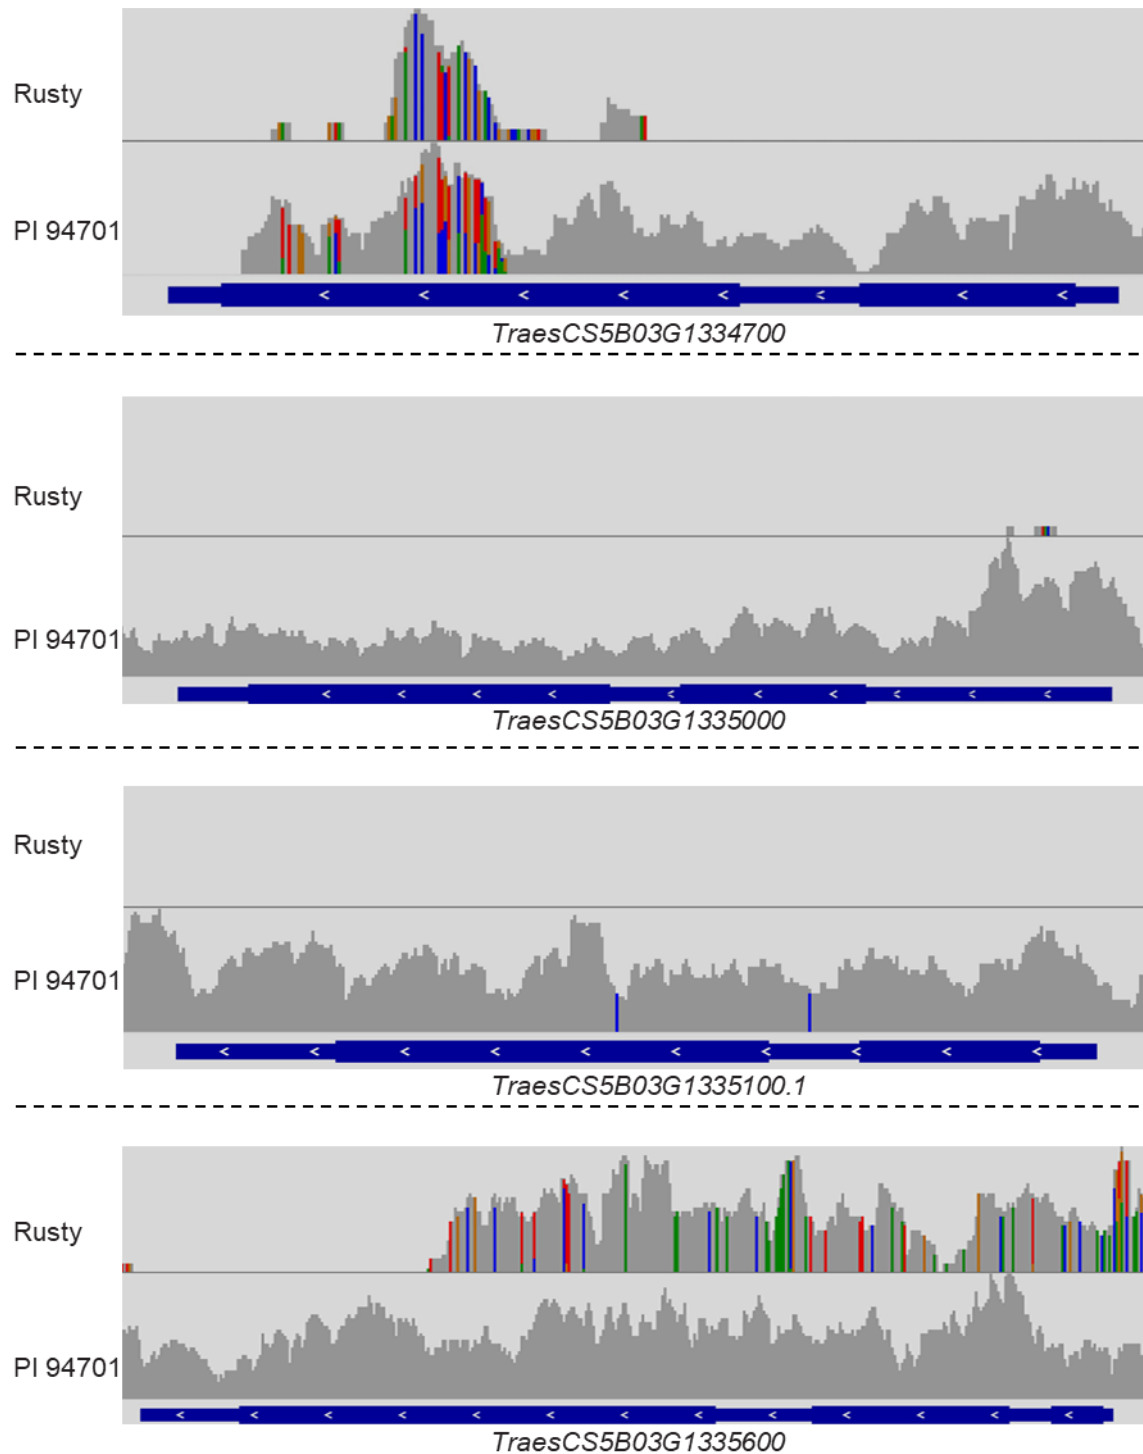

**Figure S2** Comparison of the whole-genome resequencing reads from Rusty and PI 94701 for the candidate genes using the alignment algorithm BWA-MEM. For genes *TraesCS5B03G1335000* and *TraesCS5B03G1335100.1*, no reads from Rusty were detected in the whole-genome sequencing data. The image illustrates sequence read numbers (Y-axis) and position in the candidate gene contigs (X-axis). Colored rectangles (blue) represent the gene structure.

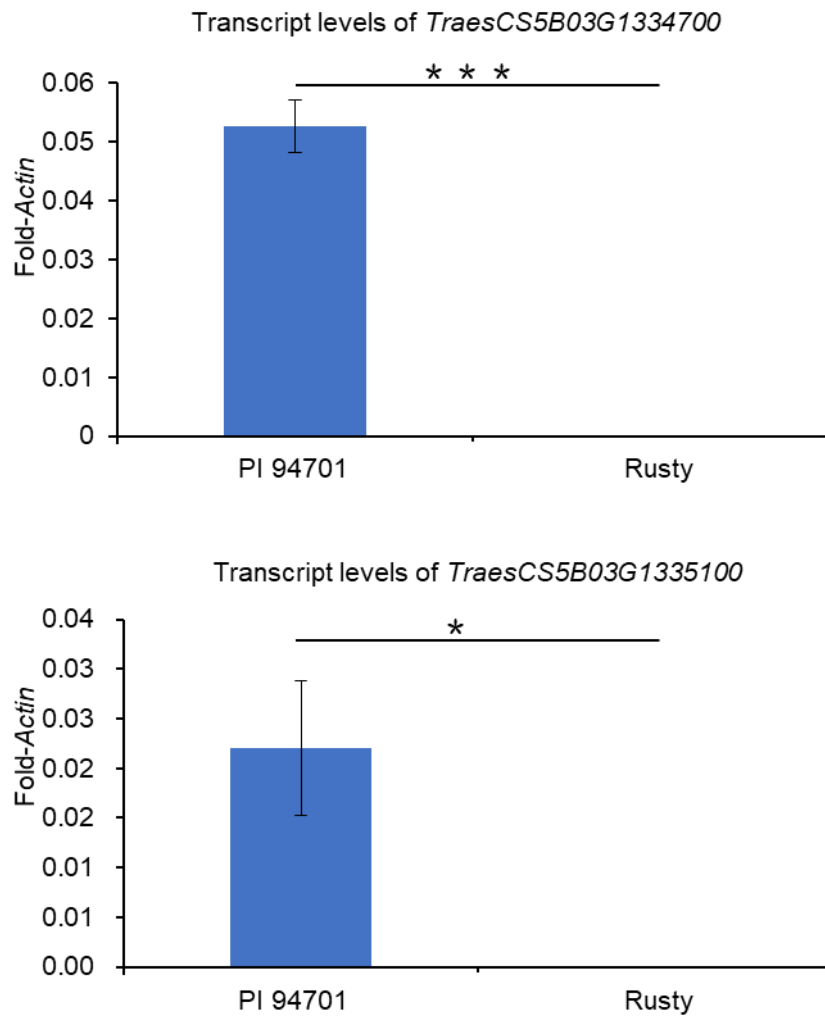

**Figure S3** Transcript levels of the candidate genes *TraesCS5B03G1334700* and *TraesCS5B03G1335100* in F<sub>4</sub> sister lines S73 and R32. Seedlings of S73 and R32 were inoculated with *Pgt* race 34MKGQM and leaf samples from multiple plants were collected at 6 dpi. Transcript levels were expressed as fold-*Actin* (n = 4), and error bars represent standard errors of the mean.

## Supplementary Tables

**Table S1.** Avirulence / virulence formulae of the *Puccinia graminis* f. sp. *tritici* races used in this study.

| Race (isolate)      | Origin | Avirulence                                                                                                | Virulence                                                                                                      |
|---------------------|--------|-----------------------------------------------------------------------------------------------------------|----------------------------------------------------------------------------------------------------------------|
| BCCBC (09CA115-2)   | USA    | <i>SrPI94701</i> 5 6 7b 8a 9a 9d 9e 9b 10 11<br>21 24 30 31 36 38 <i>Tmp</i>                              | <i>Sr9g</i> 17 <i>McN</i>                                                                                      |
| 34MTGSM (20GSA1)    | China  | <i>SrPI94701</i> 8155b 9e 12 13 14 17 21 22<br>23 26 30 31 33 35 36 37 38 47 <i>Tmp</i>                   | <i>Sr5</i> 6 7b 8a 9a 9b 9d 9f 9g 10 11 15 16<br>18 19 20 24 25 27 28 29 32 34 39 <i>McN</i>                   |
| 34C3RTGQM (20IAL32) | China  | <i>SrPI94701</i> 8155b 9e 10 12 13 15 17 19<br>20 23 27 30 31 33 35 36 37 38 <i>Tmp</i>                   | <i>Sr5</i> 6 7b 8a 9a 9b 9d 9g 11 14 18 21 24<br>25 28 29 32 34 <i>McN</i>                                     |
| 21C3CTTTM (20GH13)  | China  | <i>SrPI94701</i> 8155b 5 9e 14 19 21 22 23<br>26 27 31 33 35 37 38 39 47                                  | <i>Sr6</i> 7b 8a 9a 9b 9d 9f 9g 10 11 12 13 15<br>16 17 18 20 24 25 28 29 30 32 34 36 <i>Tmp</i><br><i>McN</i> |
| 34MKGQM (20IAL06)   | China  | <i>SrPI94701</i> 8155b 9e 10 11 13 14 17 18<br>19 21 22 23 25 26 30 31 33 34 35 36<br>37 38 47 <i>Tmp</i> | <i>Sr5</i> 6 7b 8a 9a 9b 9d 9f 9g 12 15 16 20<br>24 27 28 29 32 39 <i>McN</i>                                  |
| 34C3RKGQM (21PK9)   | China  | <i>SrPI94701</i> 8155b 10 11 13 14 15 17<br>18 20 22 25 30 31 33 34 35 36 37 <i>Tmp</i>                   | <i>Sr5</i> 8a 12 19 21 23 24 27 28 29 32 <i>McN</i>                                                            |

**Table S2.** SNPs linked with *SrPI94701* and their locations in the Svevo Rel.1.0.

| Chromosome | Location (bp) | Allele | Rusty (SP) | PI 94701 (RP) | S-Bulk | R-Bulk |
|------------|---------------|--------|------------|---------------|--------|--------|
| 5B         | 673537026     | A/C    | A          | C             | A      | C      |
| 5B         | 673538615     | C/T    | C          | T             | C      | T      |
| 5B         | 673538642     | A/G    | A          | G             | A      | G      |
| 5B         | 690132538     | A/G    | A          | G             | A      | G      |
| 5B         | 690132553     | T/C    | T          | C             | T      | C      |
| 5B         | 690132681     | C/T    | C          | T             | C      | T      |
| 5B         | 690132702     | T/C    | T          | C             | T      | C      |
| 5B         | 690132780     | T/C    | T          | C             | T      | C      |
| 5B         | 690132918     | A/G    | A          | G             | A      | G      |
| 5B         | 690133547     | A/G    | A          | G             | A      | G      |
| 5B         | 690134308     | T/C    | T          | C             | T      | C      |
| 5B         | 690134560     | T/G    | T          | G             | T      | G      |
| 5B         | 690134566     | A/C    | A          | C             | A      | C      |
| 5B         | 690134809     | C/A    | C          | A             | C      | A      |
| 5B         | 690134913     | G/A    | G          | A             | G      | A      |
| 5B         | 690450276     | G/T    | G          | T             | G      | T      |
| 5B         | 690450564     | T/C    | T          | C             | T      | C      |
| 5B         | 690450594     | T/C    | T          | C             | T      | C      |
| 5B         | 690450645     | C/G    | C          | G             | C      | G      |
| 5B         | 690451829     | T/C    | T          | C             | T      | C      |
| 5B         | 690452397     | G/A    | G          | A             | G      | A      |
| 5B         | 690452463     | G/A    | G          | A             | G      | A      |
| 5B         | 690452487     | C/T    | C          | T             | C      | T      |
| 5B         | 690452862     | G/A    | G          | A             | G      | A      |
| 5B         | 690452906     | T/C    | T          | C             | T      | C      |
| 5B         | 690452930     | T/C    | T          | C             | T      | C      |
| 5B         | 690452960     | C/T    | C          | T             | C      | T      |
| 5B         | 690548168     | G/A    | G          | A             | G      | A      |
| 5B         | 690548198     | C/G    | C          | G             | C      | G      |
| 5B         | 690548266     | C/G    | C          | G             | C      | G      |
| 5B         | 690548320     | G/C    | G          | C             | G      | C      |
| 5B         | 690548365     | G/A    | G          | A             | G      | A      |
| 5B         | 690549265     | A/G    | A          | G             | A      | G      |
| 5B         | 690549283     | T/C    | T          | C             | T      | C      |
| 5B         | 690550559     | C/T    | C          | T             | C      | T      |
| 5B         | 690696603     | T/C    | T          | C             | T      | C      |
| 5B         | 690696608     | G/A    | G          | A             | G      | A      |
| 5B         | 690696623     | G/C    | G          | C             | G      | C      |
| 5B         | 690696749     | C/T    | C          | T             | C      | T      |
| 5B         | 690696846     | T/C    | T          | C             | T      | C      |
| 5B         | 690699742     | C/G    | C          | G             | C      | G      |

|    |           |     |   |   |   |   |
|----|-----------|-----|---|---|---|---|
| 5B | 690700002 | A/G | A | G | A | G |
| 5B | 690700038 | A/G | A | G | A | G |
| 5B | 690700079 | T/A | T | A | T | A |
| 5B | 690700693 | G/A | G | A | G | A |
| 5B | 691140854 | T/C | T | C | T | C |
| 5B | 691140864 | G/A | G | A | G | A |
| 5B | 691140907 | T/C | T | C | T | C |
| 5B | 691140978 | A/G | A | G | A | G |
| 5B | 691142510 | A/G | A | G | A | G |
| 5B | 691142522 | G/A | G | A | G | A |
| 5B | 691142606 | C/G | C | G | C | G |
| 5B | 691142630 | G/C | G | C | G | C |
| 5B | 691142744 | C/G | C | G | C | G |
| 5B | 691142884 | G/C | G | C | G | C |
| 5B | 691142990 | C/T | C | T | C | T |
| 5B | 691153376 | G/A | G | A | G | A |
| 5B | 691155372 | C/T | C | T | C | T |
| 5B | 691158423 | A/G | A | G | A | G |
| 5B | 691162721 | C/T | C | T | C | T |
| 5B | 691163268 | T/C | T | C | T | C |
| 5B | 691453615 | T/C | T | C | T | C |
| 5B | 691454084 | C/T | C | T | C | T |
| 5B | 691455997 | A/G | A | G | A | G |
| 5B | 691456015 | C/T | C | T | C | T |
| 5B | 691456471 | A/G | A | G | A | G |
| 5B | 691456611 | A/G | A | G | A | G |
| 5B | 691456672 | T/C | T | C | T | C |
| 5B | 691456696 | G/T | G | T | G | T |
| 5B | 691456859 | T/C | T | C | T | C |
| 5B | 691460240 | G/A | G | A | G | A |
| 5B | 691460596 | G/A | G | A | G | A |
| 5B | 691460602 | A/T | A | T | A | T |
| 5B | 691460806 | A/G | A | G | A | G |
| 5B | 691460858 | C/A | C | A | C | A |
| 5B | 691676385 | A/G | A | G | A | G |
| 5B | 691676406 | A/G | A | G | A | G |
| 5B | 691676445 | G/A | G | A | G | A |
| 5B | 691676493 | C/G | C | G | C | G |
| 5B | 691676500 | T/C | T | C | T | C |
| 5B | 691679615 | G/C | G | C | G | C |
| 5B | 691679621 | G/C | G | C | G | C |
| 5B | 691685590 | G/A | G | A | G | A |
| 5B | 691685656 | G/A | G | A | G | A |
| 5B | 691870564 | C/T | C | T | C | T |

|    |           |     |   |   |   |   |
|----|-----------|-----|---|---|---|---|
| 5B | 691870707 | G/A | G | A | G | A |
| 5B | 691874455 | G/A | G | A | G | A |
| 5B | 691874927 | T/C | T | C | T | C |
| 5B | 691875084 | A/C | A | C | A | C |
| 5B | 691875126 | T/C | T | C | T | C |
| 5B | 691875285 | C/T | C | T | C | T |
| 5B | 695900839 | G/A | G | A | G | A |
| 5B | 695900896 | C/T | C | T | C | T |
| 5B | 695901007 | T/C | T | C | T | C |
| 5B | 695905265 | C/T | C | T | C | T |
| 5B | 695905408 | C/G | C | G | C | G |
| 5B | 695905497 | C/A | C | A | C | A |
| 5B | 695905514 | A/C | A | C | A | C |
| 5B | 695905562 | C/T | C | T | C | T |
| 5B | 695905802 | G/C | G | C | G | C |
| 5B | 695905892 | A/G | A | G | A | G |
| 5B | 695905974 | A/G | A | G | A | G |
| 5B | 696004071 | A/G | A | G | A | G |
| 5B | 696004590 | C/G | C | G | C | G |
| 5B | 696004614 | G/A | G | A | G | A |
| 5B | 696006223 | C/T | C | T | C | T |
| 5B | 696012374 | G/C | G | C | G | C |
| 5B | 696012468 | G/A | G | A | G | A |
| 5B | 696012965 | C/A | C | A | C | A |
| 5B | 696013709 | T/G | T | G | T | G |
| 5B | 696024115 | A/G | A | G | A | G |
| 5B | 696027510 | C/G | C | G | C | G |
| 5B | 696029048 | T/C | T | C | T | C |
| 5B | 696375467 | G/A | G | A | G | A |
| 5B | 696558983 | T/C | T | C | T | C |
| 5B | 697067391 | G/A | G | A | G | A |
| 5B | 697067436 | A/C | A | C | A | C |
| 5B | 697093006 | G/C | G | C | G | C |
| 5B | 697098140 | G/A | G | A | G | A |
| 5B | 697412714 | C/T | C | T | C | T |
| 5B | 697413013 | C/T | C | T | C | T |
| 5B | 697413096 | G/C | G | C | G | C |
| 5B | 697413597 | T/A | T | A | T | A |
| 5B | 697413616 | G/A | G | A | G | A |
| 5B | 697415781 | G/T | G | T | G | T |
| 5B | 697415795 | C/G | C | G | C | G |
| 5B | 697415801 | T/C | T | C | T | C |
| 5B | 697416098 | G/A | G | A | G | A |
| 5B | 697416206 | G/A | G | A | G | A |

|    |           |     |   |   |   |   |
|----|-----------|-----|---|---|---|---|
| 5B | 697416227 | T/C | T | C | T | C |
| 5B | 697416254 | A/T | A | T | A | T |
| 5B | 697416305 | A/G | A | G | A | G |
| 5B | 697416402 | G/A | G | A | G | A |
| 5B | 697416416 | G/A | G | A | G | A |
| 5B | 698037709 | A/G | A | G | A | G |
| 5B | 698039600 | A/G | A | G | A | G |
| 5B | 698194607 | A/G | A | G | A | G |
| 5B | 698194686 | T/C | T | C | T | C |
| 5B | 698195129 | T/C | T | C | T | C |
| 5B | 698195167 | G/A | G | A | G | A |
| 5B | 698195375 | T/G | T | G | T | G |
| 5B | 698809491 | C/G | C | G | C | G |
| 5B | 698809555 | A/G | A | G | A | G |
| 5B | 698827028 | T/C | T | C | T | C |
| 5B | 698828178 | G/A | G | A | G | A |
| 5B | 698832399 | C/T | C | T | C | T |
| 5B | 698834478 | G/C | G | C | G | C |
| 5B | 698834524 | G/A | G | A | G | A |
| 5B | 698834615 | T/C | T | C | T | C |
| 5B | 698834843 | G/C | G | C | G | C |
| 5B | 699873281 | T/C | T | C | T | C |
| 5B | 699873308 | C/T | C | T | C | T |
| 5B | 699873320 | G/A | G | A | G | A |
| 5B | 699873359 | G/A | G | A | G | A |
| 5B | 699873389 | G/T | G | T | G | T |
| 5B | 699874865 | C/G | C | G | C | G |
| 5B | 699874977 | C/T | C | T | C | T |
| 5B | 699936236 | C/A | C | A | C | A |
| 5B | 699936256 | A/C | A | C | A | C |
| 5B | 699936373 | C/G | C | G | C | G |

---

**Table S3.** Predicted genes within the *SrPI94701* candidate region based on the genomic sequence of Svevo Rel.1.0. NBS-LRR (NLR) genes are highlighted in blue and protein kinases are highlighted in green.

| Gene ID in Svevo Rel.1.0 | Location(bp)        | Gene annotation                                                |
|--------------------------|---------------------|----------------------------------------------------------------|
| <i>TRITD5Bv1G248710</i>  | 691246432:691253036 | NBS-LRR Disease resistance protein                             |
| <i>TRITD5Bv1G248720</i>  | 691256419:691257925 | Protein FAR1-RELATED SEQUENCE 5                                |
| <i>TRITD5Bv1G248730</i>  | 691257962:691258753 | Protein FAR1-RELATED SEQUENCE 5                                |
| <i>TRITD5Bv1G248740</i>  | 691282213:691282788 | Pol polyprotein                                                |
| <i>TRITD5Bv1G248750</i>  | 691306412:691306741 | Gag-pol polyprotein                                            |
| <i>TRITD5Bv1G248760</i>  | 691338839:691341573 | Acyl-[acyl-carrier-protein] desaturase                         |
| <i>TRITD5Bv1G248770</i>  | 691339761:691340111 | —                                                              |
| <i>TRITD5Bv1G248780</i>  | 691370776:691371072 | Retrotransposon protein                                        |
| <i>TRITD5Bv1G248790</i>  | 691436922:691437227 | Transposon protein                                             |
| <i>TRITD5Bv1G248800</i>  | 691454049:691460239 | Transducin/WD-like repeat-protein                              |
| <i>TRITD5Bv1G248810</i>  | 691501161:691501856 | Retrovirus-related Pol polyprotein from transposon TNT 1-94 TE |
| <i>TRITD5Bv1G248820</i>  | 691503752:691504072 | Potassium voltage-gated channel subfamily V member 1 G         |
| <i>TRITD5Bv1G248830</i>  | 691514447:691514833 | Transposon protein                                             |
| <i>PTRITDBv1G248840</i>  | 691538292:691538983 | Acyl-[acyl-carrier-protein] desaturase                         |
| <i>TRITD5Bv1G248850</i>  | 691539040:691539351 | Acyl-[acyl-carrier-protein] desaturase                         |
| <i>TRITD5Bv1G248860</i>  | 691548302:691548911 | Hydroxyproline-rich glycoprotein family protein G              |
| <i>TRITD5Bv1G248870</i>  | 691559538:691560569 | Ethylene-responsive transcription factor                       |
| <i>TRITD5Bv1G248880</i>  | 691566157:691566906 | E3 ubiquitin-protein ligase pub1 G                             |
| <i>TRITD5Bv1G248890</i>  | 691595319:691595885 | Ethylene-responsive transcription factor                       |
| <i>TRITD5Bv1G248900</i>  | 691599040:691599384 | Retrovirus-related Pol polyprotein from transposon TNT 1-94 TE |
| <i>TRITD5Bv1G248910</i>  | 691599928:691600257 | Reverse transcriptase                                          |
| <i>TRITD5Bv1G248920</i>  | 691600525:691600935 | Retrovirus-related Pol polyprotein from transposon TNT 1-94 TE |
| <i>TRITD5Bv1G248930</i>  | 691601784:691602509 | Retrovirus-related Pol polyprotein from transposon TNT 1-94    |
| <i>TRITD5Bv1G248940</i>  | 691657895:691658254 | RNA-dependent RNA polymerase 6 G                               |
| <i>TRITD5Bv1G248950</i>  | 691659748:691660071 | NAD(P)-binding Rossmann-fold superfamily protein G             |
| <i>TRITD5Bv1G248960</i>  | 691666704:691668634 | Hydroxyproline-rich glycoprotein family protein G              |
| <i>TRITD5Bv1G248970</i>  | 691670573:691671654 | Pentatricopeptide repeat-containing protein                    |
| <i>TRITD5Bv1G248980</i>  | 691672790:691673122 | Polynucleotidyl transferase                                    |
| <i>TRITD5Bv1G248990</i>  | 691676349:691680291 | Derlin; Ahrd_quality_code                                      |
| <i>TRITD5Bv1G249000</i>  | 691685567:691689823 | DNA polymerase epsilon subunit                                 |
| <i>TRITD5Bv1G249010</i>  | 691690959:691691510 | Myb domain protein                                             |
| <i>TRITD5Bv1G249020</i>  | 691732804:691733645 | Retrotransposon protein                                        |
| <i>TRITD5Bv1G249030</i>  | 691735599:691736756 | Retrovirus-related Pol polyprotein from transposon TNT 1-94    |
| <i>TRITD5Bv1G249040</i>  | 691815441:691815758 | Retrotransposon protein                                        |
| <i>TRITD5Bv1G249050</i>  | 691839589:691840263 | Hydroxyproline-rich glycoprotein G                             |
| <i>TRITD5Bv1G249060</i>  | 691863162:691866572 | Receptor-like protein kinase                                   |
| <i>TRITD5Bv1G249070</i>  | 691868660:691868971 | Gamma-glutamyltranspeptidase 3 G                               |
| <i>TRITD5Bv1G249080</i>  | 691870608:691872047 | Alanine--tRNA ligase G                                         |
| <i>TRITD5Bv1G249090</i>  | 691872523:691874891 | Ycf20-like protein                                             |

|                         |                     |                                                             |
|-------------------------|---------------------|-------------------------------------------------------------|
| <i>TRITD5Bv1G249100</i> | 691883573:691883971 | Cytoplasmic FMR1-interacting protein 1 G                    |
| <i>TRITD5Bv1G249110</i> | 691890931:691891428 | GRF zinc finger family protein TE?                          |
| <i>TRITD5Bv1G249120</i> | 691894360:691894905 | Transposon protein                                          |
| <i>TRITD5Bv1G249130</i> | 691902419:691902742 | Retrovirus-related Pol polyprotein from transposon TNT 1-94 |
| <i>TRITD5Bv1G249140</i> | 691930058:691930432 | Retrovirus-related Pol polyprotein from transposon TNT 1-94 |
| <i>TRITD5Bv1G249150</i> | 691943897:691944693 | Homeodomain-like superfamily protein G                      |
| <i>TRITD5Bv1G249160</i> | 691945345:691945959 | Ulp1 protease family                                        |
| <i>TRITD5Bv1G249170</i> | 691946772:691950677 | tRNA-dihydrouridine(20/20a) synthase G                      |
| <i>TRITD5Bv1G249180</i> | 691950741:691951342 | Lipoxygenase G                                              |
| <i>TRITD5Bv1G249190</i> | 691958543:691958899 | Werner Syndrome-like exonuclease                            |
| <i>TRITD5Bv1G249200</i> | 691973655:691974086 | Retrotransposon protein                                     |
| <i>TRITD5Bv1G249210</i> | 692004485:692019358 | Flavin-containing monooxygenase                             |
| <i>TRITD5Bv1G249230</i> | 692056751:692057218 | —                                                           |
| <i>TRITD5Bv1G249240</i> | 692080884:692081324 | Transcription elongation factor SPT5 G                      |
| <i>TRITD5Bv1G249250</i> | 692095406:692096778 | Retrovirus-related Pol polyprotein from transposon TNT 1-94 |
| <i>TRITD5Bv1G249260</i> | 692105390:692107005 | Ankyrin repeat family protein                               |
| <i>TRITD5Bv1G249270</i> | 692107641:692108152 | Ankyrin repeat family protein                               |
| <i>TRITD5Bv1G249280</i> | 692110261:692117686 | Ankyrin repeat family protein                               |
| <i>TRITD5Bv1G249290</i> | 692164235:692164801 | Retrotransposon protein                                     |
| <i>TRITD5Bv1G249300</i> | 692179316:692179690 | Retrovirus-related Pol polyprotein from transposon TNT 1-94 |
| <i>TRITD5Bv1G249310</i> | 692180146:692180550 | Retrovirus-related Pol polyprotein from transposon TNT 1-94 |
| <i>TRITD5Bv1G249320</i> | 692180838:692181200 | Retrovirus-related Pol polyprotein from transposon TNT 1-94 |
| <i>TRITD5Bv1G249330</i> | 692190354:692191598 | Myosin-10 G; ID=TRITD5Bv1G249330.1                          |
| <i>TRITD5Bv1G249340</i> | 692197169:692197468 | 3-hydroxy-3-methylglutaryl-coenzyme A reductase G           |
| <i>TRITD5Bv1G249350</i> | 692257785:692271857 | Methyl-CpG-binding domain-containing protein                |
| <i>TRITD5Bv1G249360</i> | 692280840:692283572 | F-box family protein                                        |

---

**Table S4.** Predicted genes in the *SrPI94701* candidate region based on the genomic sequence of Chinese Spring (RefSeq v2.1). NBS-LRR (NLR) genes are highlighted in blue and protein kinases are highlighted in green. The expression levels of the candidate genes were based on published RNAseq studies compiled in the wheat expVIP database (<http://www.wheat-expression.com/>).

| Gene ID in CS RefSeq v2.1  | Start        | END          | Strand | Function description                                  | Expression or not |
|----------------------------|--------------|--------------|--------|-------------------------------------------------------|-------------------|
| <i>TraesCS5B03G1334300</i> | 702.560373Mb | 702.564756Mb | -      | Disease resistance protein RPM1                       | Not               |
| <i>TraesCS5B03G1334500</i> | 702.61405Mb  | 702.616221Mb | +      | Leucine-rich repeat receptor kinase-like protein      | Not               |
| <i>TraesCS5B03G1334600</i> | 702.618368Mb | 702.618688Mb | +      | Protein kinase family protein                         | Not               |
| <i>TraesCS5B03G1334700</i> | 702.631769Mb | 702.635441Mb | -      | Disease resistance protein RPM1                       | Yes               |
| <i>TraesCS5B03G1334900</i> | 702.643865Mb | 702.645383Mb | +      | Receptor-like protein kinase                          | Not               |
| <i>TraesCS5B03G1335000</i> | 702.677875Mb | 702.68294Mb  | -      | Disease resistance protein                            | Yes               |
| <i>TraesCS5B03G1335100</i> | 702.716212Mb | 702.720447Mb | -      | Disease resistance protein RPM1                       | Yes               |
| <i>TraesCS5B03G1335200</i> | 702.754213Mb | 702.755609Mb | +      | Werner Syndrome-like exonuclease                      | Not               |
| <i>TraesCS5B03G1335300</i> | 702.785489Mb | 702.790804Mb | -      | Disease resistance protein RPM1                       | Yes               |
| <i>TraesCS5B03G1335500</i> | 702.844686Mb | 702.848323Mb | +      | Receptor-like protein kinase                          | Yes               |
| <i>TraesCS5B03G1335600</i> | 702.852439Mb | 702.8582Mb   | -      | Disease resistance protein (NBS-LRR class) family     | Yes               |
| <i>TraesCS5B03G1335800</i> | 702.911476Mb | 702.915825Mb | -      | Disease resistance protein RPM1                       | Not               |
| <i>TraesCS5B03G1335900</i> | 703.642969Mb | 703.644782Mb | -      | Acyl-[acyl-carrier-protein] desaturase                | Not               |
| <i>TraesCS5B03G1336100</i> | 703.808523Mb | 703.81611Mb  | +      | Transducin/WD-like repeat-protein                     | Yes               |
| <i>TraesCS5B03G1336800</i> | 704.098827Mb | 704.099421Mb | -      | Hydroxyproline-rich glycoprotein family protein       | Not               |
| <i>TraesCS5B03G1337300</i> | 704.194205Mb | 704.194931Mb | +      | Ethylene-responsive transcription factor              | Not               |
| <i>TraesCS5B03G1337400</i> | 704.219804Mb | 704.220353Mb | -      | Hydroxyproline-rich glycoprotein family protein       | Yes               |
| <i>TraesCS5B03G1337600</i> | 704.223674Mb | 704.225128Mb | -      | Pentatricopeptide repeat-containing protein, putative | Yes               |
| <i>TraesCS5B03G1337700</i> | 704.226305Mb | 704.230813Mb | -      | Derlin                                                | Yes               |
| <i>TraesCS5B03G1337800</i> | 704.236306Mb | 704.241341Mb | +      | Nuclear factor Y, subunit C10                         | Yes               |
| <i>TraesCS5B03G1338000</i> | 704.242878Mb | 704.245073Mb | +      | Protein kinase family protein                         | Yes               |
| <i>TraesCS5B03G1338200</i> | 704.361881Mb | 704.362863Mb | -      | Hydroxyproline-rich glycoprotein                      | Yes               |
| <i>TraesCS5B03G1338300</i> | 704.387634Mb | 704.391029Mb | +      | Receptor-like protein kinase                          | Yes               |
| <i>TraesCS5B03G1338400</i> | 704.402336Mb | 704.404802Mb | +      | Ycf20-like protein                                    | Yes               |
| <i>TraesCS5B03G1338800</i> | 704.414913Mb | 704.416601Mb | +      | Flavin-containing monooxygenase                       | Not               |
| <i>TraesCS5B03G1339700</i> | 704.517287Mb | 704.525047Mb | -      | Ankyrin repeat family protein                         | Yes               |
| <i>TraesCS5B03G1340100</i> | 704.695036Mb | 704.699363Mb | +      | Methyl-CpG-binding domain-containing protein 9        | Not               |
| <i>TraesCS5B03G1340200</i> | 704.708346Mb | 704.711203Mb | -      | F-box family protein                                  | Not               |

**Table S5.** Differentially expressed genes (DEGs) in the *SrPI94701* candidate region. TPM (transcripts per million) is used to measure expression levels. Differentially expressed genes (FDR < 0.05; *p*-value < 0.05; and |log2foldchange| > 1) are highlighted in bold.

| Gene ID                    | Resistant groups |              |              | Susceptible groups |              |              | log2FoldChange | <i>p</i> -value | FDR         | Annotation                                        |
|----------------------------|------------------|--------------|--------------|--------------------|--------------|--------------|----------------|-----------------|-------------|---------------------------------------------------|
|                            | R32-1            | R32-2        | R32-3        | S73-1              | S73-2        | S73-3        |                |                 |             |                                                   |
| <i>TraesCS5B03G1334700</i> | <b>2.20</b>      | <b>2.10</b>  | <b>2.42</b>  | <b>0.00</b>        | <b>0.00</b>  | <b>0.00</b>  | <b>10.28</b>   | <b>0.00</b>     | <b>0.00</b> | Disease resistance protein RPM1                   |
| <i>TraesCS5B03G1335000</i> | <b>2.47</b>      | <b>1.95</b>  | <b>1.54</b>  | <b>0.00</b>        | <b>0.00</b>  | <b>0.00</b>  | <b>10.16</b>   | <b>0.00</b>     | <b>0.00</b> | Disease resistance protein                        |
| <i>TraesCS5B03G1335100</i> | <b>0.24</b>      | <b>0.24</b>  | <b>0.19</b>  | <b>0.00</b>        | <b>0.00</b>  | <b>0.00</b>  | <b>6.95</b>    | <b>0.00</b>     | <b>0.00</b> | Disease resistance protein RPM1                   |
| <i>TraesCS5B03G1335500</i> | 3.94             | 0.08         | 2.81         | 2.59               | 1.85         | 1.92         | 0.26           | 0.83            | 0.96        | Receptor-like protein kinase                      |
| <i>TraesCS5B03G1335600</i> | <b>1.24</b>      | <b>1.49</b>  | <b>0.95</b>  | <b>0.30</b>        | <b>0.44</b>  | <b>0.33</b>  | <b>1.55</b>    | <b>0.00</b>     | <b>0.00</b> | Disease resistance protein (NBS-LRR class) family |
| <i>TraesCS5B03G1336100</i> | <b>10.32</b>     | <b>11.01</b> | <b>8.68</b>  | <b>2.97</b>        | <b>2.85</b>  | <b>3.99</b>  | <b>1.34</b>    | <b>0.00</b>     | <b>0.00</b> | Transducin/WD-like repeat-protein                 |
| <i>TraesCS5B03G1337400</i> | 1.04             | 2.82         | 2.37         | 0.00               | 1.14         | 0.25         | 2.09           | 0.06            | 0.33        | Hydroxyproline-rich glycoprotein family protein   |
| <i>TraesCS5B03G1337600</i> | <b>0.40</b>      | <b>0.77</b>  | <b>0.41</b>  | <b>0.00</b>        | <b>0.08</b>  | <b>0.02</b>  | <b>3.82</b>    | <b>0.00</b>     | <b>0.01</b> | Pentatricopeptide repeat-containing protein       |
| <i>TraesCS5B03G1337700</i> | <b>42.32</b>     | <b>42.22</b> | <b>43.80</b> | <b>9.60</b>        | <b>10.22</b> | <b>11.34</b> | <b>1.77</b>    | <b>0.00</b>     | <b>0.00</b> | Derlin                                            |
| <i>TraesCS5B03G1337800</i> | 1.61             | 1.79         | 1.22         | 1.29               | 1.17         | 1.43         | 0.03           | 0.93            | 0.99        | Nuclear factor Y, subunit C10                     |
| <i>TraesCS5B03G1338000</i> | 0.47             | 0.18         | 0.18         | 0.08               | 0.13         | 0.00         | 1.67           | 0.16            | 0.54        | Protein kinase family protein                     |
| <i>TraesCS5B03G1338200</i> | 1.94             | 6.57         | 6.13         | 2.03               | 2.76         | 1.66         | 0.93           | 0.08            | 0.39        | Hydroxyproline-rich glycoprotein                  |
| <i>TraesCS5B03G1338400</i> | 6.65             | 7.25         | 8.52         | 7.97               | 7.07         | 7.60         | 0.30           | 0.36            | 0.76        | Ycf20-like protein                                |
| <i>TraesCS5B03G1339700</i> | 0.83             | 0.47         | 0.06         | 0.13               | 0.54         | 0.18         | 0.48           | 0.60            | 0.89        | Ankyrin repeat family protein                     |
| <i>TraesCS5B03G1340200</i> | <b>0.08</b>      | <b>0.00</b>  | <b>0.06</b>  | <b>0.55</b>        | <b>0.96</b>  | <b>0.48</b>  | <b>4.10</b>    | <b>0.00</b>     | <b>0.00</b> | F-box family protein                              |

**Table S6.** Genotyping results for markers *pku69124*, *pku69187*, *pku69211*, *pku69227*, and *pku69228*. A collection comprising 53 *T. dicoccon* accessions and 51 *T. aestivum* genotypes was used in this study. Wheat accessions carry the *SrPI94701* haplotype are highlighted in green. NT, not test.

| Accessions | Species            | Markers                         |                                  |                                     |                                   |                                      | Pgt race |
|------------|--------------------|---------------------------------|----------------------------------|-------------------------------------|-----------------------------------|--------------------------------------|----------|
|            |                    | <i>pku69124</i> ( <i>SspI</i> ) | <i>pku69187</i> ( <i>BbvCI</i> ) | <i>pku69211</i> ( <i>HpyCH4IV</i> ) | <i>pku69227</i> ( <i>Pvu II</i> ) | <i>pku69228</i> ( <i>Hpy188III</i> ) |          |
| PI 94701   | <i>T. durum</i>    | A                               | A                                | A                                   | A                                 | A                                    | 1+/2-    |
| Rusty      | <i>T. durum</i>    | B                               | B                                | B                                   | B                                 | B                                    | 3+       |
| CItr 12214 | <i>T. dicoccon</i> | A                               | A                                | A                                   | A                                 | A                                    | 1+       |
| CItr 14621 | <i>T. dicoccon</i> | A                               | A                                | H                                   | A                                 | A                                    | 2/2+     |
| CItr 14637 | <i>T. dicoccon</i> | A                               | A                                | A                                   | A                                 | A                                    | 1+       |
| CItr 14919 | <i>T. dicoccon</i> | A                               | A                                | H                                   | A                                 | A                                    | 1-       |
| CItr 14970 | <i>T. dicoccon</i> | A                               | A                                | A                                   | A                                 | A                                    | 1+       |
| PI 94615   | <i>T. dicoccon</i> | A                               | B                                | B                                   | A                                 | A                                    | 0;/1-    |
| PI 94616   | <i>T. dicoccon</i> | A                               | B                                | A                                   | A                                 | A                                    | 0        |
| PI 94626   | <i>T. dicoccon</i> | A                               | B                                | A                                   | A                                 | A                                    | 0;       |
| PI 94631   | <i>T. dicoccon</i> | A                               | A                                | A                                   | A                                 | A                                    | 1+/2     |
| PI 94638   | <i>T. dicoccon</i> | A                               | B                                | A                                   | A                                 | A                                    | 0        |
| PI 94656   | <i>T. dicoccon</i> | A                               | A                                | A                                   | A                                 | A                                    | 1/1+     |
| PI 94657   | <i>T. dicoccon</i> | B                               | B                                | A                                   | A                                 | A                                    | 0        |
| PI 94664   | <i>T. dicoccon</i> | A                               | A                                | A                                   | A                                 | A                                    | 1+       |
| PI 94666   | <i>T. dicoccon</i> | A                               | B                                | A                                   | A                                 | A                                    | 1+       |
| PI 94674   | <i>T. dicoccon</i> | A                               | B                                | A                                   | A                                 | A                                    | 1/1+     |
| PI 94675   | <i>T. dicoccon</i> | A                               | B                                | A                                   | A                                 | A                                    | 1        |
| PI 154582  | <i>T. dicoccon</i> | B                               | B                                | B                                   | B                                 | A                                    | 1/1+     |
| PI 168679  | <i>T. dicoccon</i> | A                               | B                                | A                                   | A                                 | A                                    | 1/1+     |
| PI 193877  | <i>T. dicoccon</i> | A                               | A                                | A                                   | A                                 | A                                    | 1-       |
| PI 193879  | <i>T. dicoccon</i> | A                               | A                                | A                                   | A                                 | A                                    | 1-       |
| PI 193880  | <i>T. dicoccon</i> | A                               | A                                | A                                   | A                                 | A                                    | 1-       |
| PI 193882  | <i>T. dicoccon</i> | A                               | A                                | A                                   | A                                 | A                                    | 1        |
| PI 194042  | <i>T. dicoccon</i> | A                               | A                                | A                                   | A                                 | A                                    | 1+       |
| PI 194375  | <i>T. dicoccon</i> | A                               | A                                | A                                   | A                                 | A                                    | 1+       |
| PI 197259  | <i>T. dicoccon</i> | A                               | A                                | A                                   | A                                 | A                                    | 1+/2     |
| PI 197260  | <i>T. dicoccon</i> | A                               | A                                | A                                   | A                                 | A                                    | 1/1+     |
| PI 197481  | <i>T. dicoccon</i> | A                               | A                                | A                                   | A                                 | A                                    | 1+/2     |
| PI 197485  | <i>T. dicoccon</i> | A                               | A                                | A                                   | A                                 | A                                    | 1-       |
| PI 197489  | <i>T. dicoccon</i> | A                               | A                                | A                                   | A                                 | A                                    | 2+/3     |
| PI 197495  | <i>T. dicoccon</i> | A                               | A                                | A                                   | A                                 | A                                    | 1        |
| PI 217637  | <i>T. dicoccon</i> | A                               | A                                | A                                   | A                                 | A                                    | 1+       |
| PI 217639  | <i>T. dicoccon</i> | A                               | B                                | A                                   | A                                 | A                                    | 1-/1     |
| PI 221400  | <i>T. dicoccon</i> | B                               | B                                | A                                   | A                                 | A                                    | 0        |
| PI 225332  | <i>T. dicoccon</i> | B                               | B                                | A                                   | A                                 | A                                    | 3        |

|             |                    |                |                |   |   |                |      |
|-------------|--------------------|----------------|----------------|---|---|----------------|------|
| PI 244341   | <i>T. dicoccon</i> | A              | A              | A | A | A              | 1+   |
| PI 254147   | <i>T. dicoccon</i> | A              | A              | A | A | A              | 1+   |
| PI 254164   | <i>T. dicoccon</i> | B              | A              | A | A | A              | 3    |
| PI 254165   | <i>T. dicoccon</i> | B              | A              | A | A | A              | 3    |
| PI 254190   | <i>T. dicoccon</i> | A              | B              | A | A | A              | 1-/1 |
| PI 272531   | <i>T. dicoccon</i> | A              | B              | A | A | A              | 1+   |
| PI 273978   | <i>T. dicoccon</i> | A              | A              | A | A | A              | 1+   |
| PI 273980   | <i>T. dicoccon</i> | A              | A              | A | A | A              | 4    |
| PI 273981   | <i>T. dicoccon</i> | A              | A              | A | A | A              | 1+   |
| PI 275996   | <i>T. dicoccon</i> | A              | A              | A | A | A              | 1+/2 |
| PI 276013   | <i>T. dicoccon</i> | No PCR product | B              | A | B | A              | 3/3+ |
| PI 298582   | <i>T. dicoccon</i> | A              | A              | A | A | A              | 1/1+ |
| PI 298586   | <i>T. dicoccon</i> | A              | A              | A | A | A              | 1+   |
| PI 324076   | <i>T. dicoccon</i> | A              | A              | A | A | A              | 1+   |
| PI 349043   | <i>T. dicoccon</i> | A              | B              | A | A | A              | 1    |
| PI 355477   | <i>T. dicoccon</i> | A              | A              | A | A | A              | 1-   |
| PI 355507   | <i>T. dicoccon</i> | A              | B              | B | A | A              | 0    |
| PI 362696   | <i>T. dicoccon</i> | H              | B              | A | A | A              | 0    |
| PI 377657   | <i>T. dicoccon</i> | B              | B              | A | A | A              | 1    |
| ISr8a-Ra    | <i>T. aestivum</i> | A              | No PCR product | A | A | A              | 3    |
| ISr9a-Ra    | <i>T. aestivum</i> | A              | No PCR product | A | A | A              | 4    |
| Avocet-S    | <i>T. aestivum</i> | A              | H              | B | B | A              | 4    |
| ISr5-Ra     | <i>T. aestivum</i> | A              | H              | A | A | A              | 4    |
| Jinan17     | <i>T. aestivum</i> | A              | H              | A | B | A              | 4    |
| Jimai229    | <i>T. aestivum</i> | A              | H              | A | B | A              | NT   |
| Jimai24     | <i>T. aestivum</i> | A              | H              | A | B | A              | NT   |
| Jimai44     | <i>T. aestivum</i> | A              | No PCR product | A | B | No PCR product | NT   |
| Yannong19   | <i>T. aestivum</i> | A              | A              | A | B | H              | NT   |
| Huaimai40   | <i>T. aestivum</i> | A              | A              | A | A | A              | 4    |
| Huaimai22   | <i>T. aestivum</i> | A              | H              | A | A | A              | NT   |
| Huaimai44   | <i>T. aestivum</i> | A              | A              | A | B | No PCR product | NT   |
| Luyuan502   | <i>T. aestivum</i> | A              | A              | A | A | A              | 4    |
| Zhongmai895 | <i>T. aestivum</i> | A              | H              | A | B | H              | NT   |
| Zhongmai578 | <i>T. aestivum</i> | A              | No PCR product | A | B | A              | NT   |
| Yumai70     | <i>T. aestivum</i> | A              | No PCR product | A | B | B              | NT   |
| Fielder     | <i>T. aestivum</i> | H              | B              | B | B | A              | 4    |
| Ningchun4   | <i>T. aestivum</i> | A              | H              | A | A | A              | 4    |
| Xiaoyan22   | <i>T. aestivum</i> | A              | A              | A | A | A              | NT   |
| PI 660060   | <i>T. aestivum</i> | H              | B              | B | B | A              | NT   |
| PI 600064   | <i>T. aestivum</i> | H              | A              | A | B | A              | NT   |
| PI 679621   | <i>T. aestivum</i> | A              | No PCR product | A | A | A              | NT   |
| PI 648417   | <i>T. aestivum</i> | A              | A              | A | A | A              | NT   |
| PI 442904   | <i>T. aestivum</i> | A              | A              | A | B | A              | NT   |
| PI 603918   | <i>T. aestivum</i> | A              | A              | A | B | A              | NT   |

|            |                    |   |                |                |   |                |    |
|------------|--------------------|---|----------------|----------------|---|----------------|----|
| PI 189747  | <i>T. aestivum</i> | H | B              | H              | B | A              | NT |
| PI 660057  | <i>T. aestivum</i> | A | A              | A              | B | A              | NT |
| PI 182527  | <i>T. aestivum</i> | B | B              | H              | B | A              | NT |
| PI 600683  | <i>T. aestivum</i> | A | A              | A              | B | A              | NT |
| PI 660056  | <i>T. aestivum</i> | A | A              | B              | B | A              | NT |
| PI 679605  | <i>T. aestivum</i> | A | A              | A              | B | No PCR product | NT |
| GSTR409    | <i>T. aestivum</i> | A | A              | B              | B | A              | NT |
| PI 675564  | <i>T. aestivum</i> | H | B              | B              | B | A              | NT |
| PI 672538  | <i>T. aestivum</i> | A | A              | A              | B | A              | NT |
| PI 277012  | <i>T. aestivum</i> | A | A              | A              | A | A              | NT |
| PI 596533  | <i>T. aestivum</i> | A | A              | A              | A | A              | NT |
| PI 679598  | <i>T. aestivum</i> | A | A              | B              | B | A              | NT |
| PI 679603  | <i>T. aestivum</i> | H | B              | H              | B | A              | NT |
| GSTR437    | <i>T. aestivum</i> | A | A              | B              | B | A              | NT |
| GSTR441    | <i>T. aestivum</i> | A | A              | A              | A | A              | NT |
| PI 638738  | <i>T. aestivum</i> | A | A              | A              | A | A              | NT |
| Taichang29 | <i>T. aestivum</i> | A | A              | A              | B | A              | NT |
| GSTR425    | <i>T. aestivum</i> | A | A              | B              | B | A              | NT |
| Xinong511  | <i>T. aestivum</i> | A | A              | A              | B | A              | NT |
| CItr15082  | <i>T. aestivum</i> | A | A              | No PCR product | B | A              | NT |
| GSTR434    | <i>T. aestivum</i> | A | A              | B              | B | A              | NT |
| GSTR429    | <i>T. aestivum</i> | A | A              | B              | B | A              | NT |
| GSTR428    | <i>T. aestivum</i> | A | A              | B              | B | A              | NT |
| GSTR420    | <i>T. aestivum</i> | A | A              | B              | B | A              | NT |
| GSTR501    | <i>T. aestivum</i> | A | No PCR product | A              | A | A              | NT |
| GSTR522    | <i>T. aestivum</i> | A | A              | A              | B | A              | NT |
